# Supplementary material
Source: PubMed Central journal article supplement (PMC8972673)
Supplement: 11427_2021_2093_MOESM1_ESM.pdf [file 11427_2021_2093_MOESM1_ESM.pdf]

Supplementary Table 1. In vivo anti-SARS-CoV-2 efficacy of compounds targeting the viral life cycle.

| virus life cycle stage                 | Compound name     | Primary indication   | Clinical Phase for COVID-19 | in vivo performance                                          |                        | References |
|----------------------------------------|-------------------|----------------------|-----------------------------|--------------------------------------------------------------|------------------------|------------|
|                                        |                   |                      |                             | Compared to vehicle                                          | compared to Remdesivir |            |
| attachment and entry                   | camostat mesilate | pancreatitis         | Phase 2                     | about 1 log reduction in an ex vivo model (PCLS)             |                        | (1)        |
|                                        | umifenovir        | influenza            | No clinical benefit         | no in vivo data                                              |                        | (2)        |
|                                        | baricitinib       | rheumatoid arthritis | Phase 3                     | no effect on virus replication                               |                        | (3, 4)     |
| initiation translation of polyproteins | Plitidepsin       | multiple myeloma     | Phase 2/3                   | 1.5-2 log reduction, 4/8 achieved clearance in a mouse model | non-superior           | (5)        |
|                                        | Ternatin-4        | Preclinical compound |                             | no in vivo data                                              |                        | (6, 7)     |
|                                        | zotatifin         | Phase 1 for cancer   | Phase 1                     | no in vivo data                                              |                        | (6, 7)     |
|                                        | homoharritonine   | leukemia             |                             | 6/6 mice achieved clearance on 5 dpi                         |                        | This study |
| proteolytic processing                 | MI-09             | SARS-CoV-2           | animal model                | about 2 log reduction, clearance not achieved                |                        | (8)        |
|                                        | MI-30             | SARS-CoV-2           | animal model                | about 2 log reduction, clearance not achieved                |                        | (8)        |
|                                        | lopinavir         | AIDS                 | No clinical                 | no effect on virus                                           |                        | (9)        |

|                                    |                       |         |             |                                   |                                                                                                   |                |      |
|------------------------------------|-----------------------|---------|-------------|-----------------------------------|---------------------------------------------------------------------------------------------------|----------------|------|
|                                    | ritonavir             |         | AIDS        | benefit<br>No clinical<br>benefit | replication<br>no effect on virus<br>replication                                                  |                | (9)  |
| transcription & RNA<br>replication | remdesivir            |         | coronavirus | FDA-approved                      | 10/36 rhesus macaques<br>achieved clearance on 7<br>dpi                                           |                | (10) |
|                                    | EIDD-2801/MK-4482     |         | coronavirus | Phase 2a                          | 4/8 mice achieved<br>clearance if treatment<br>started 24 h after<br>exposure in the LoM<br>model |                | (11) |
| multiple steps                     | clofazimine           |         | leprosy     | Phase 2                           | 1-2 log reduction in<br>hamster model,<br>clearance not achieved                                  | less-effective | (12) |
|                                    | ranitidine<br>citrate | bismuth | anti-ulcer  |                                   | 1-1.5 log reduction,<br>clearance not achieved                                                    | non-superior   | (13) |

Supplementary Table2. Homoharringtonine (HHT) exhibits broad-spectrum inhibition efficacy against coronaviruses.

| coronavirus                                     | Abbreviation | Genus | IC50 (nM) | Reference                |
|-------------------------------------------------|--------------|-------|-----------|--------------------------|
| Middle East respiratory syndrome coronavirus    | MERS         | Beta  | 71.8      | Dyall et al. 2014(14)    |
| Mouse hepatitis coronavirus                     | MHV          | Beta  | 12        | Cao et al. 2015(15)      |
| Bovine coronavirus                              | BCoV         | Beta  | <<1uM     | Cao et al. 2015(15)      |
| Human enteric coronavirus                       | HECoV        | Beta  | <<1uM     | Cao et al. 2015(15)      |
| Porcine epidemic diarrhea virus                 | PEDV         | Alpha | 112       | Dong et al. 2018(16)     |
| Severe acute respiratory syndrome coronavirus 2 | SARS-CoV-2   | Beta  | ~100      | Wen et al. 2021(17)      |
| Severe acute respiratory syndrome coronavirus 2 | SARS-CoV-2   | Beta  | 30        | lanevski et al. 2020(18) |
| Severe acute respiratory syndrome coronavirus 2 | SARS-CoV-2   | Beta  | 2.1uM**   | Choy et al. 2020(19)     |
| Porcine epidemic diarrhea virus                 | PEDV         | Alpha | <<100     | This study               |
| Porcine deltacoronavirus                        | PDCoV        | Delta | <<100     | This study               |
| Swine acute diarrhea syndrome coronavirus       | SADS-CoV     | Alpha | <100      | This study               |

\*\* [Note - Choy et al.'s study reported a much larger IC50 value for multiple drugs, including HHT and Remdisivir (In Choy et al.'s study, IC50 of Remdisivir against SARS-CoV-2 was 26.9uM, while in many other studies, it was about 1uM(2, 20)).]

Supplementary Table 3. Basic information of the first 4 patients enrolled in ChiCTR2100049182.

|    | age(years) | sex    | Cancer type                             |
|----|------------|--------|-----------------------------------------|
| P1 | 63         | female | Lung cancer                             |
| P2 | 50         | male   | Colorectal cancer with lung metastasis  |
| P3 | 74         | male   | Colorectal cancer with lung metastasis  |
| P4 | 48         | male   | Nasopharynx cancer with lung metastasis |

References

1. M. Hoffmann *et al.*, SARS-CoV-2 Cell Entry Depends on ACE2 and TMPRSS2 and Is Blocked by a Clinically Proven Protease Inhibitor. *Cell* **181**, 271-280.e278 (2020).
2. A. Pizzorno *et al.*, In vitro evaluation of antiviral activity of single and combined repurposable drugs against SARS-CoV-2. *Antiviral Research* **181**, 104878 (2020).
3. T. N. Hoang *et al.*, Baricitinib treatment resolves lower-airway macrophage inflammation and neutrophil recruitment in SARS-CoV-2-infected rhesus macaques. *Cell* **184**, 460-475.e421 (2021).
4. A. C. Kalil *et al.*, Baricitinib plus Remdesivir for Hospitalized Adults with Covid-19. *N Engl J Med* **384**, 795-807 (2021).
5. K. M. White *et al.*, Plitidepsin has potent preclinical efficacy against SARS-CoV-2 by targeting the host protein eEF1A. *Science* **371**, 926-931 (2021).
6. D. E. Gordon *et al.*, A SARS-CoV-2 protein interaction map reveals targets for drug repurposing. *Nature* **583**, 459-468 (2020).
7. D. E. Gordon *et al.*, Comparative host-coronavirus protein interaction networks reveal pan-viral disease mechanisms. *Science* **370**, eabe9403 (2020).
8. J. Qiao *et al.*, SARS-CoV-2 M(pro) inhibitors with antiviral activity in a transgenic mouse model. *Science* **371**, 1374-1378 (2021).
9. A. Simonis, S. J. Theobald, G. Fatkenheuer, J. Rybniker, J. J. Malin, A comparative analysis of remdesivir and other repurposed antivirals against SARS-CoV-2. *EMBO Mol Med* **13**, e13105 (2021).

10. B. N. Williamson *et al.*, Clinical benefit of remdesivir in rhesus macaques infected with SARS-CoV-2. *Nature* **585**, 273-276 (2020).
11. A. Wahl *et al.*, SARS-CoV-2 infection is effectively treated and prevented by EIDD-2801. *Nature* **591**, 451-457 (2021).
12. S. Yuan *et al.*, Clofazimine broadly inhibits coronaviruses including SARS-CoV-2. *Nature* **593**, 418-423 (2021).
13. S. Yuan *et al.*, Metallo drug ranitidine bismuth citrate suppresses SARS-CoV-2 replication and relieves virus-associated pneumonia in Syrian hamsters. *Nat Microbiol* **5**, 1439-1448 (2020).
14. J. Dyllal *et al.*, Repurposing of clinically developed drugs for treatment of Middle East respiratory syndrome coronavirus infection. *Antimicrob Agents Chemother* **58**, 4885-4893 (2014).
15. J. Cao, J. C. Forrest, X. Zhang, A screen of the NIH Clinical Collection small molecule library identifies potential anti-coronavirus drugs. *Antiviral Res* **114**, 1-10 (2015).
16. H. J. Dong *et al.*, The Natural Compound Homoharringtonine Presents Broad Antiviral Activity In Vitro and In Vivo. *Viruses* **10**, (2018).
17. H. J. Wen *et al.*, A proposal for clinical trials of COVID-19 treatment using homo-harringtonine. *Natl Sci Rev* **8**, nwa257 (2021).
18. A. Ianevski *et al.*, Potential Antiviral Options against SARS-CoV-2 Infection. *Viruses* **12**, (2020).
19. K. T. Choy *et al.*, Remdesivir, lopinavir, emetine, and homoharringtonine inhibit SARS-CoV-2 replication in vitro. *Antiviral Res* **178**, 104786 (2020).

20. M. Wang *et al.*, Remdesivir and chloroquine effectively inhibit the recently emerged novel coronavirus (2019-nCoV) in vitro. *Cell Res* **30**, 269-271 (2020).
